# Supplementary material for: A multimodel evaluation of the potential impact of shipping on particle species in the Mediterranean Sea
Source: Copernicus journal article supplement (doi:10.5194/egusphere-2023-406), 2023-05-02
Supplement: Supplementary file 1 [file egusphere-2023-406-supplement.pdf]

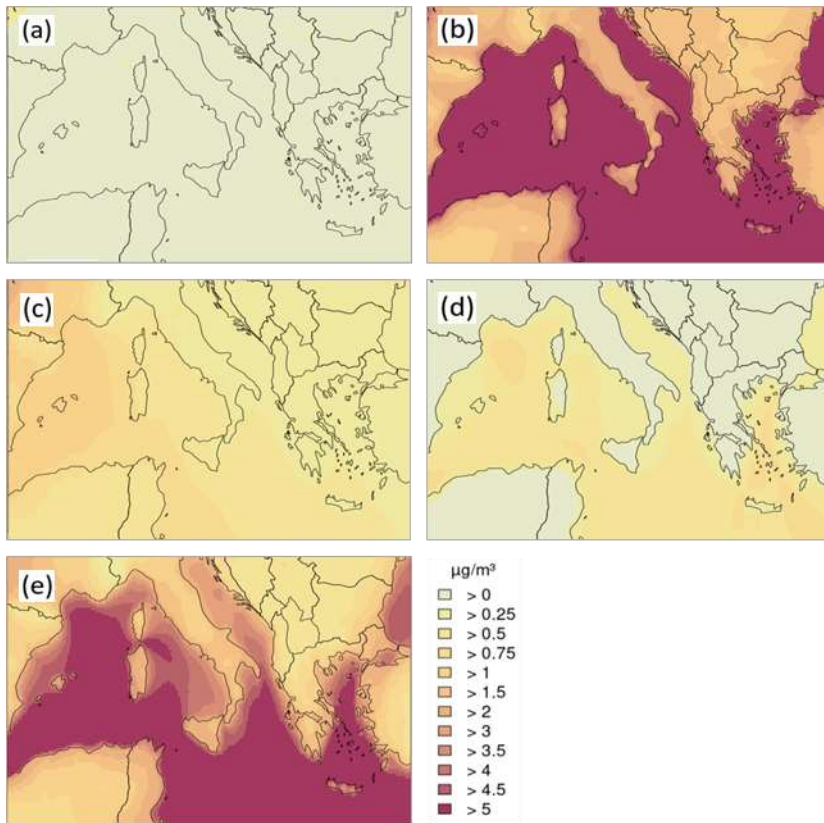

**Figure S1: Annual mean sea salt (NaCl) total concentration. (a) = CAMx, (b) = CHIMERE, (c) = CMAQ, (d) = EMEP, (e) = LOTOS-EUROS.**

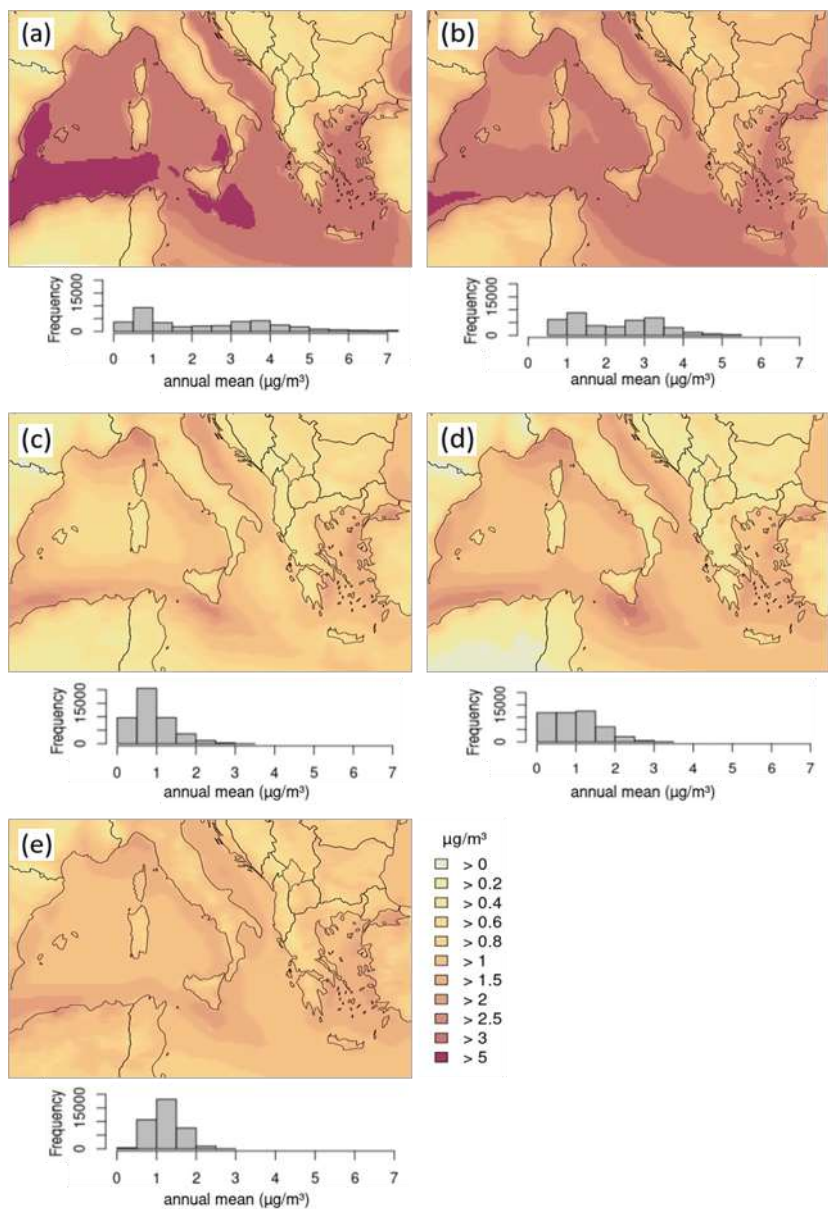

**Figure S2: Annual mean  $\text{HNO}_3$  total concentration. (a) = CAMx, (b) = CHIMERE, (c) = CMAQ, (d) = EMEP, (e) = LOTOS-EUROS. Below the domain figure is the respective frequency distribution displayed for the annual mean  $\text{HNO}_3$  concentration, referred to the whole model domain.**

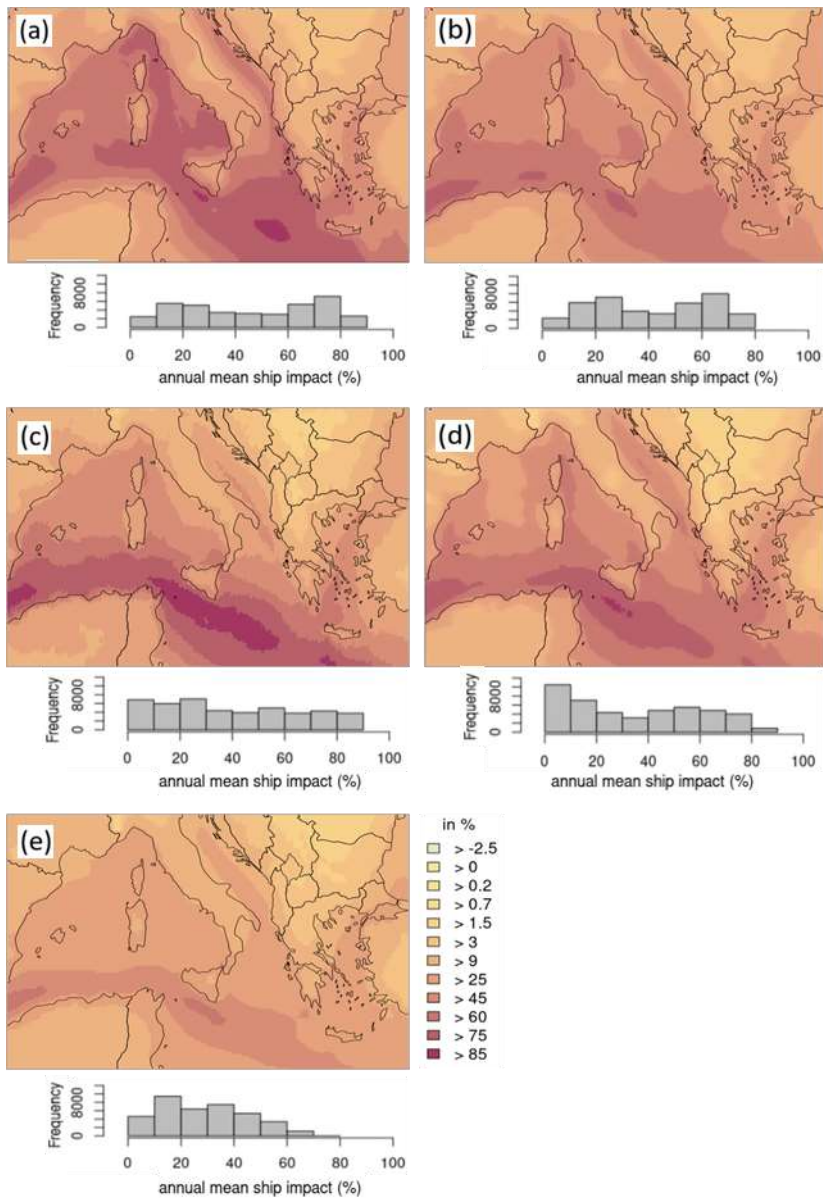

**Figure S3: Annual mean  $\text{HNO}_3$  relative potential ship impact. (a) = CAMx, (b) = CHIMERE, (c) = CMAQ, (d) = EMEP, (e) = LOTOS-EUROS. Below the domain figure is the respective frequency distribution displayed for the annual mean  $\text{HNO}_3$  potential ship impact, referred to the whole model domain.**

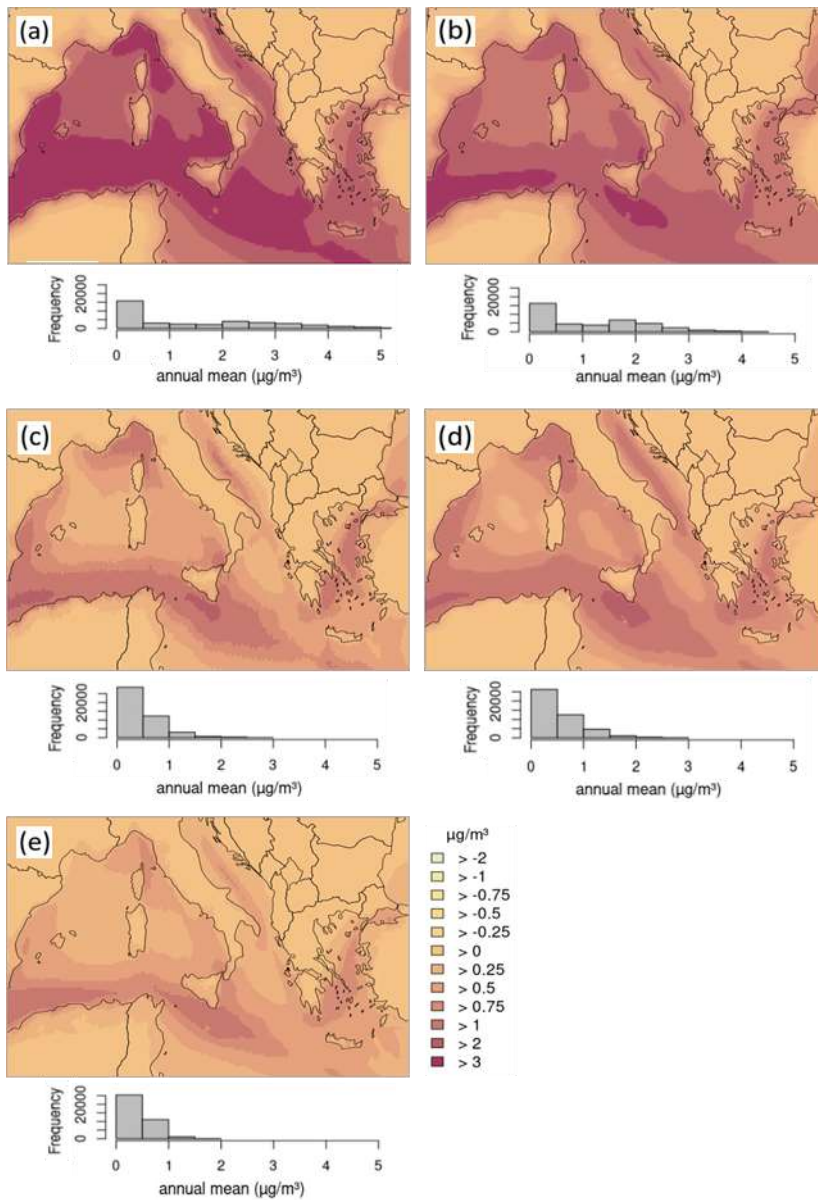

**Figure S4: Annual mean  $\text{HNO}_3$  absolute potential ship impact. (a) = CAMx, (b) = CHIMERE, (c) = CMAQ, (d) = EMEP, (e) = LOTOS-EUROS. Below the domain figure is the respective frequency distribution displayed for the annual mean  $\text{HNO}_3$  potential ship impact, referred to the whole model domain.**

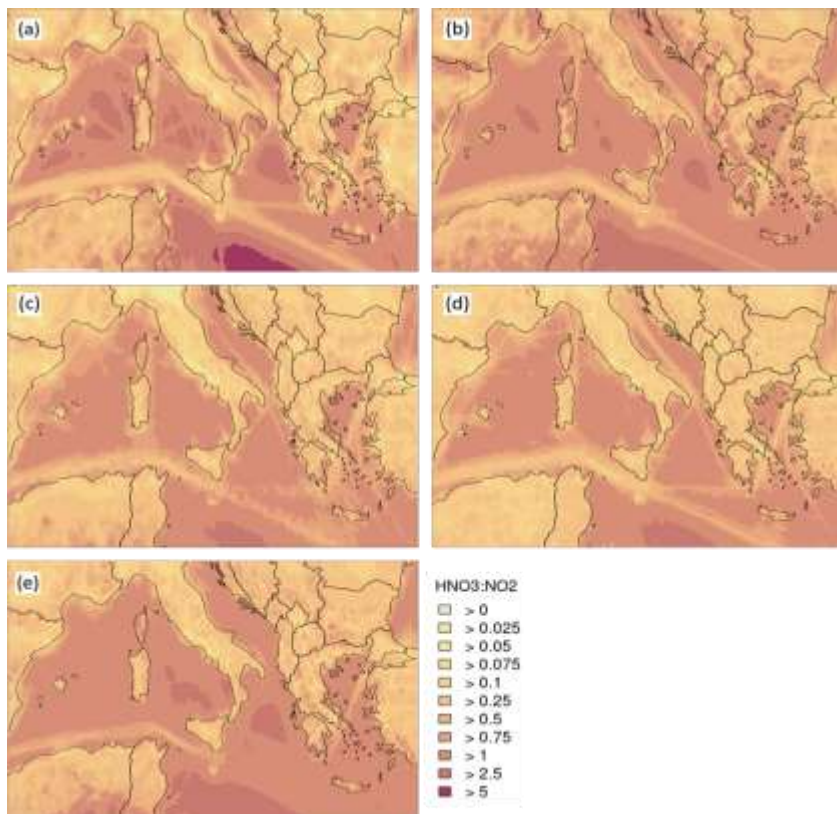

Figure S5: Annual mean ratio of  $\text{HNO}_3:\text{NO}_2$  for emisbase run with all emission sources, based on averaged daily values. (a) = CAMx, (b) = CHIMERE, (c) = CMAQ, (d) = EMEP, (e) = LOTOS-EUROS.

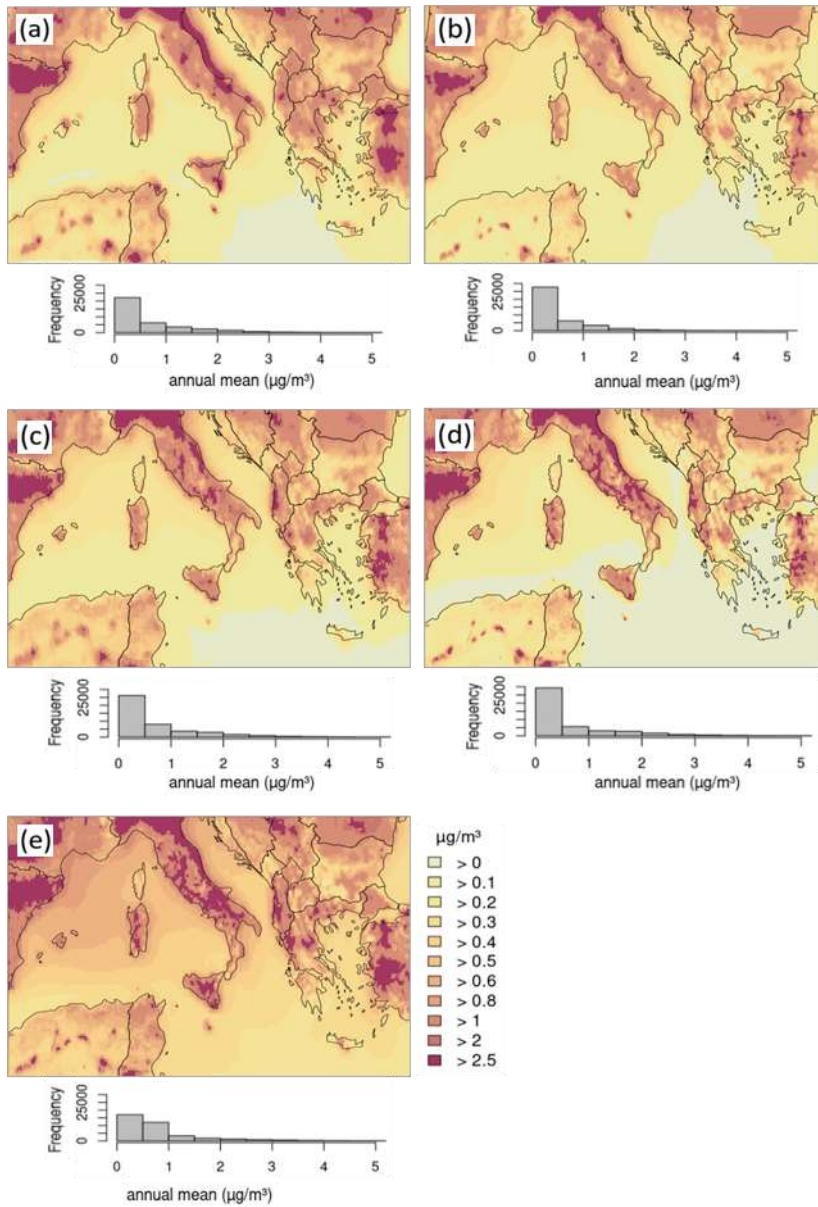

**Figure S6: Annual mean  $\text{NH}_3$  total concentration. (a) = CAMx, (b) = CHIMERE, (c) = CMAQ, (d) = EMEP, (e) = LOTOS-EUROS. Below the domain figure is the respective frequency distribution displayed for the annual mean  $\text{NH}_3$  concentration, referred to the whole model domain.**

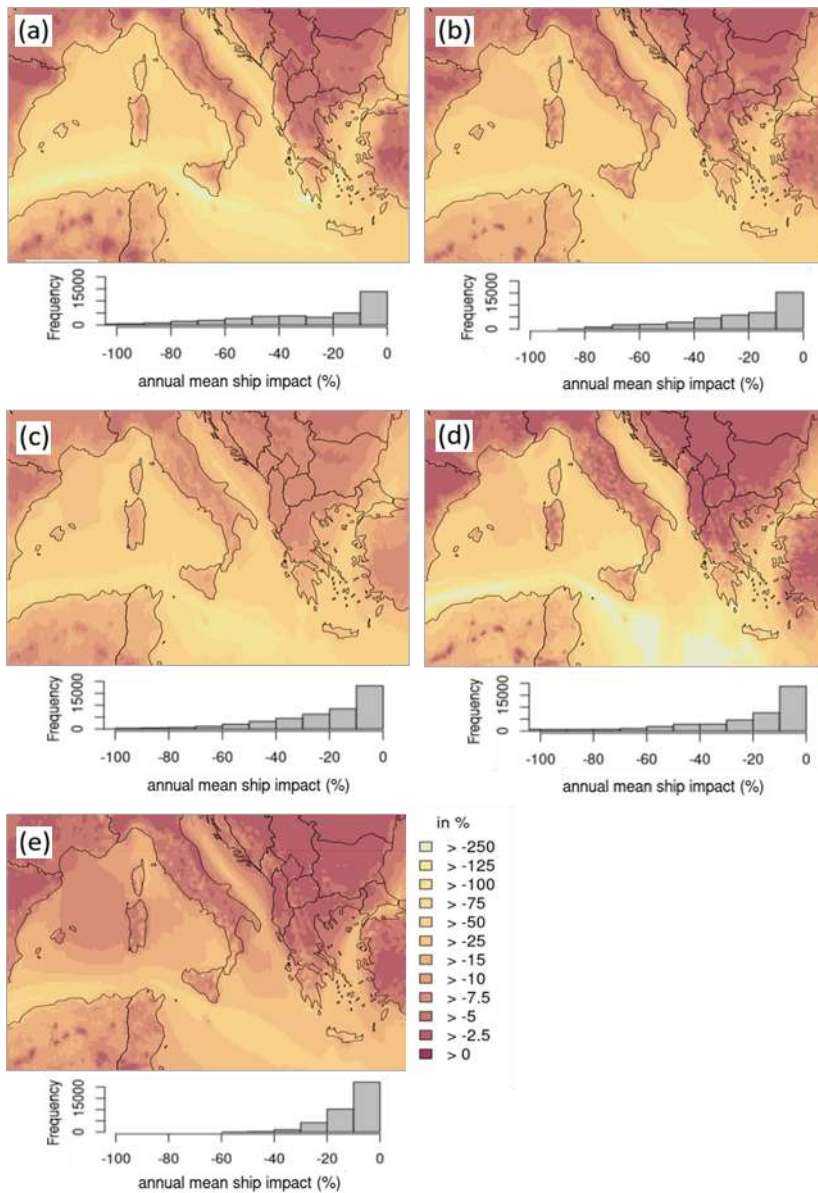

**Figure S7: Annual mean  $\text{NH}_3$  relative potential ship impact. (a) = CAMx, (b) = CHIMERE, (c) = CMAQ, (d) = EMEP, (e) = LOTOS-EUROS. Below the domain figure is the respective frequency distribution displayed for the annual mean  $\text{NH}_3$  potential ship impact, referred to the whole model domain.**

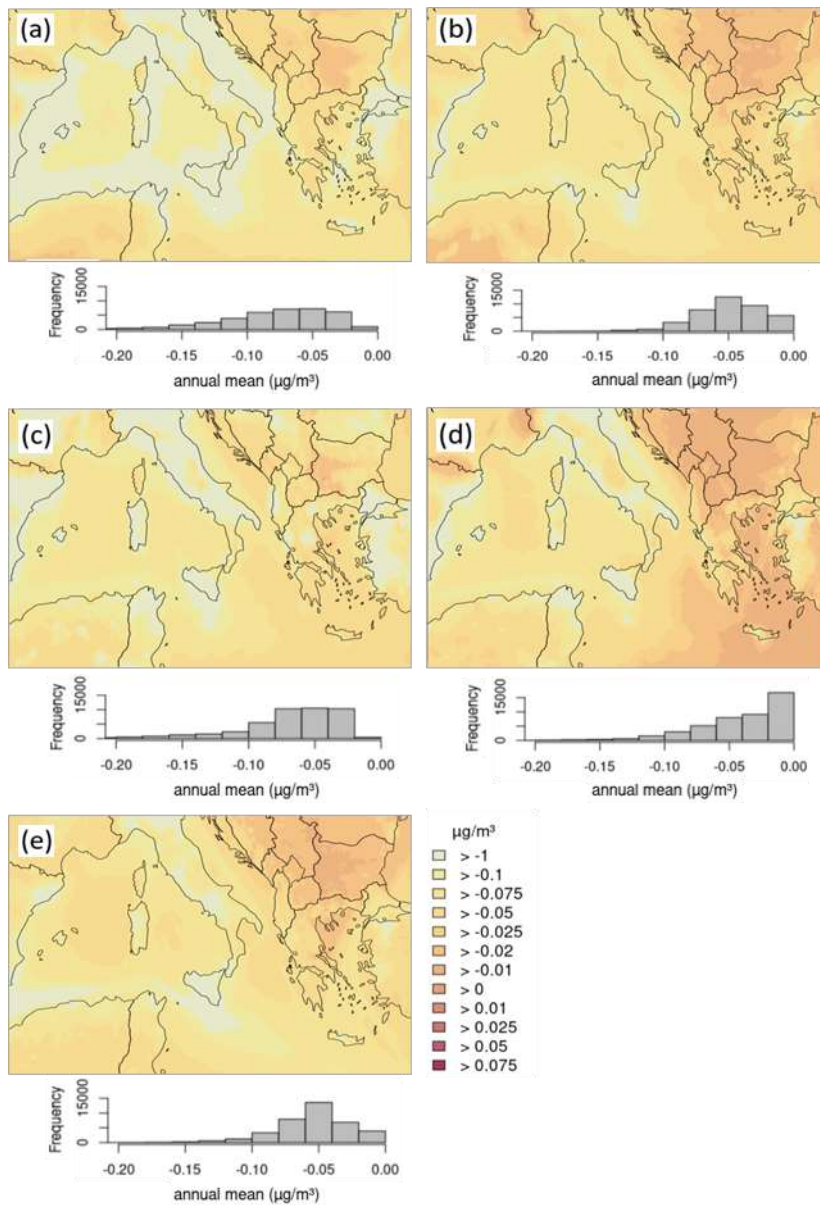

**Figure S8: Annual mean  $\text{NH}_3$  absolute potential ship impact. (a) = CAMx, (b) = CHIMERE, (c) = CMAQ, (d) = EMEP, (e) = LOTOS-EUROS. Below the domain figure is the respective frequency distribution displayed for the annual mean  $\text{NH}_3$  potential ship impact, referred to the whole model domain.**



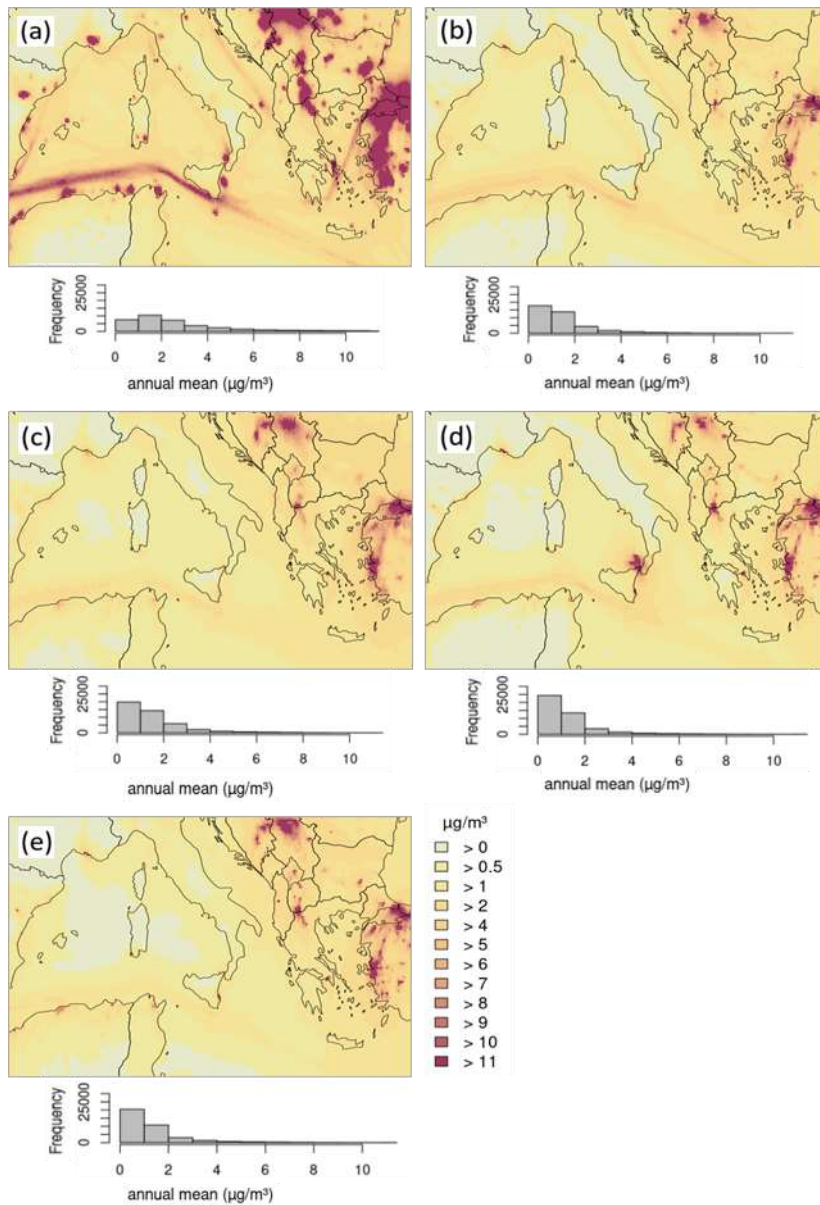

**Figure S9: Annual mean SO<sub>2</sub> total concentration. (a) = CAMx, (b) = CHIMERE, (c) = CMAQ, (d) = EMEP, (e) = LOTOS-EUROS. Below the domain figure is the respective frequency distribution displayed for the annual mean SO<sub>2</sub> concentration, referred to the whole model domain.**

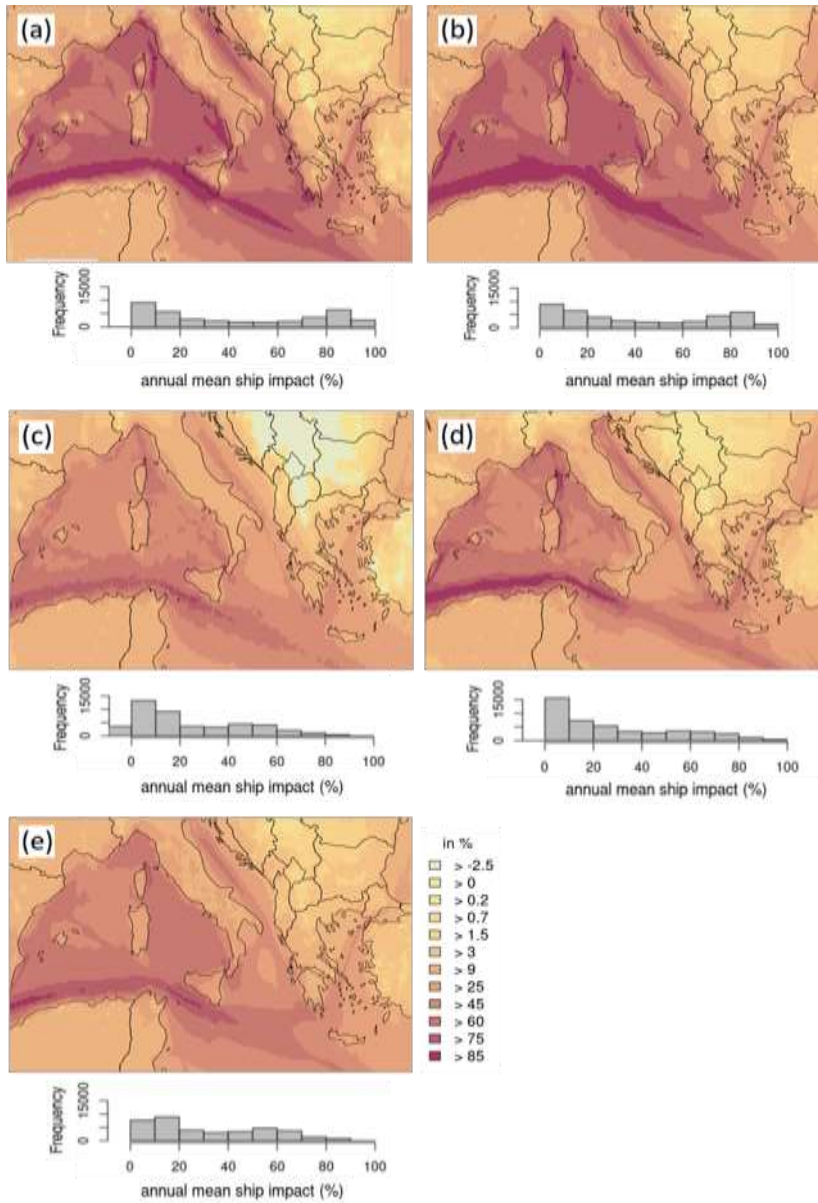

**Figure S10: Annual mean SO<sub>2</sub> relative potential ship impact. (a) = CAMx, (b) = CHIMERE, (c) = CMAQ, (d) = EMEP, (e) = LOTOS-EUROS. Below the domain figure is the respective frequency distribution displayed for the annual mean SO<sub>2</sub> potential ship impact, referred to the whole model domain.**

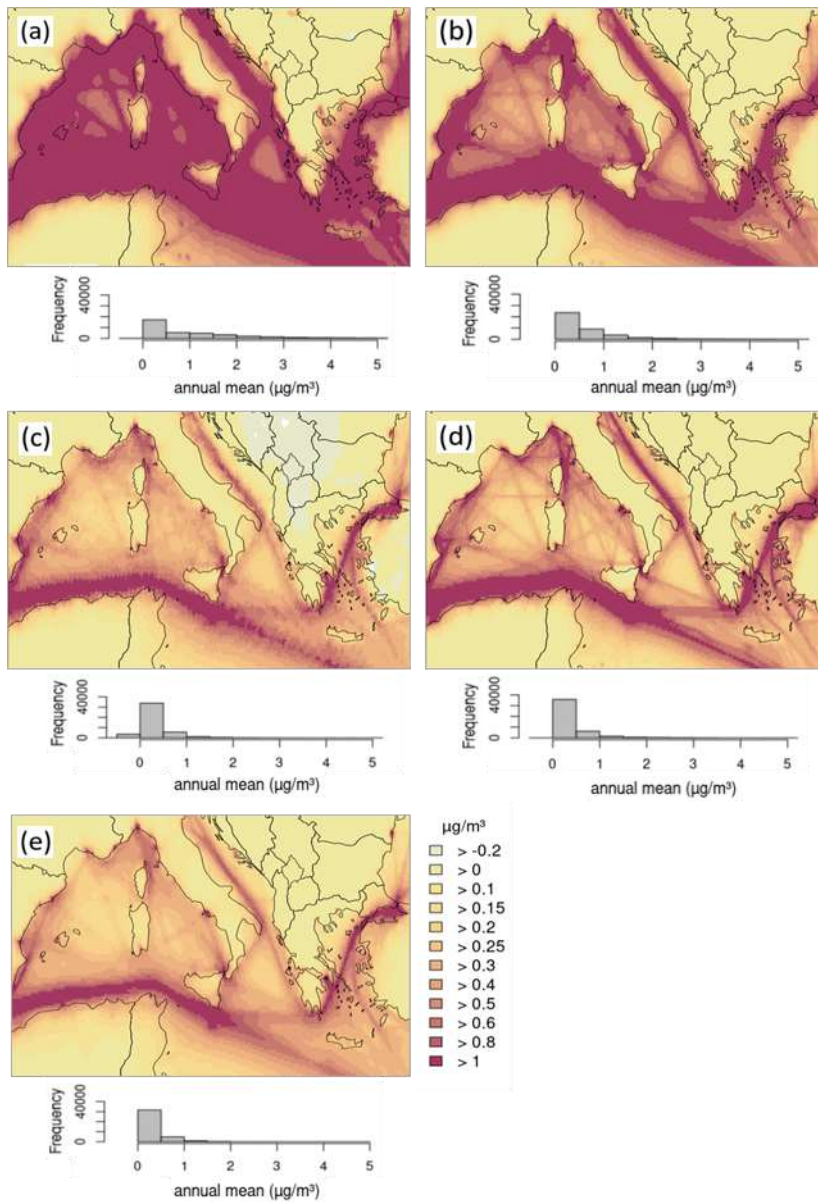

**Figure S11: Annual mean SO<sub>2</sub> absolute potential ship impact. (a) = CAMx, (b) = CHIMERE, (c) = CMAQ, (d) = EMEP, (e) = LOTOS-EUROS. Below the domain figure is the respective frequency distribution displayed for the annual mean SO<sub>2</sub> potential ship impact, referred to the whole model domain.**

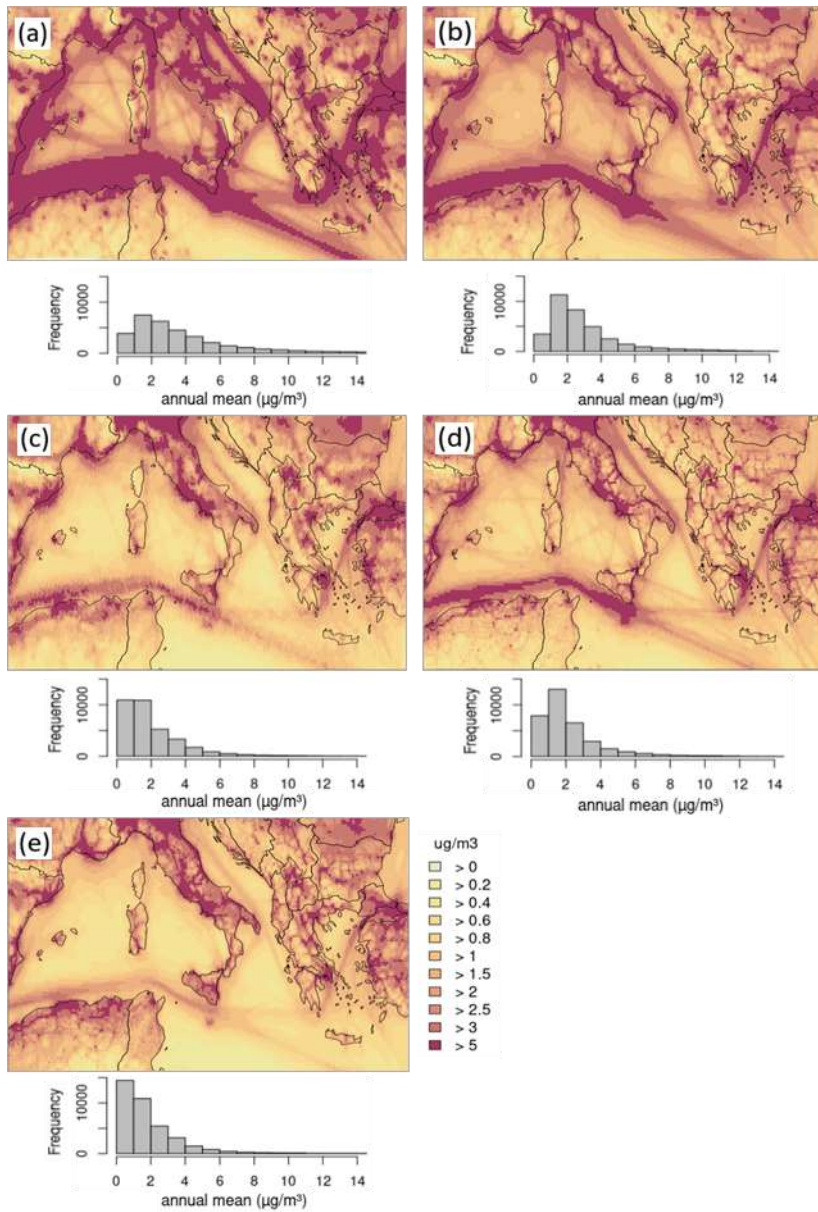

**Figure S12: Annual mean  $\text{NO}_2$  total concentration. (a) = CAMx, (b) = CHIMERE, (c) = CMAQ, (d) = EMEP, (e) = LOTOS-EUROS. Below the domain figure is the respective frequency distribution displayed for the annual mean  $\text{SO}_2$  concentration, referred to the whole model domain.**

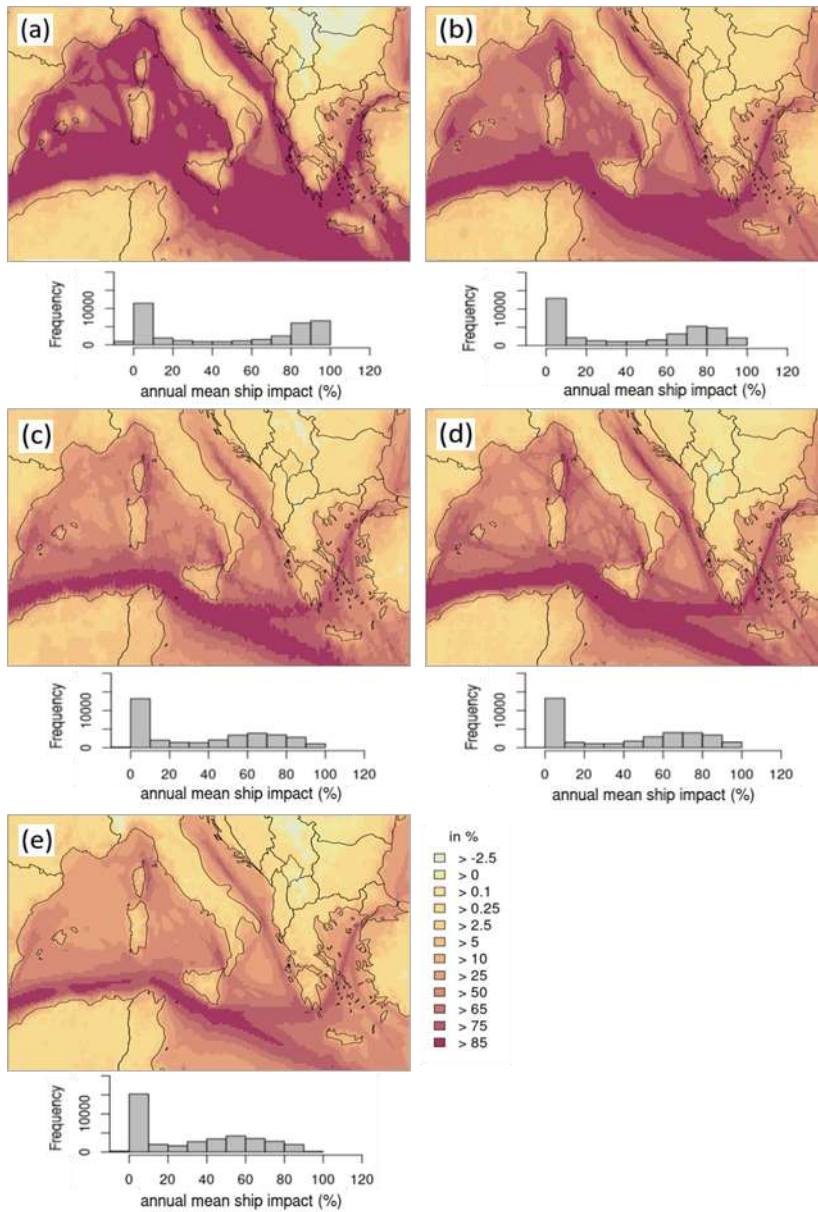

**Figure S13: Annual mean NO<sub>2</sub> relative potential ship impact. (a) = CAMx, (b) = CHIMERE, (c) = CMAQ, (d) = EMEP, (e) = LOTOS-EUROS. Below the domain figure is the respective frequency distribution displayed for the annual mean SO<sub>2</sub> potential ship impact, referred to the whole model domain.**

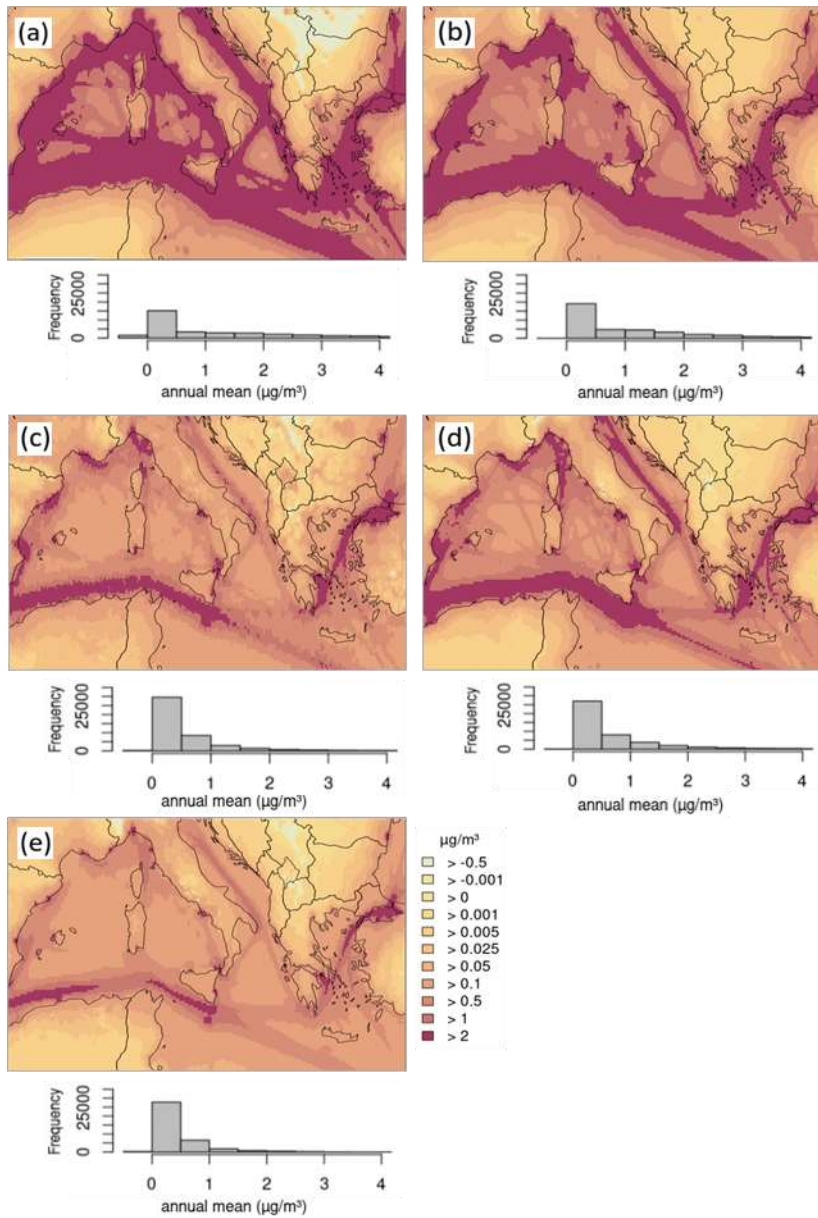

**Figure S14: Annual mean NO<sub>2</sub> absolute potential ship impact. (a) = CAMx, (b) = CHIMERE, (c) = CMAQ, (d) = EMEP, (e) = LOTOS-EUROS. Below the domain figure is the respective frequency distribution displayed for the annual mean SO<sub>2</sub> potential ship impact, referred to the whole model domain.**

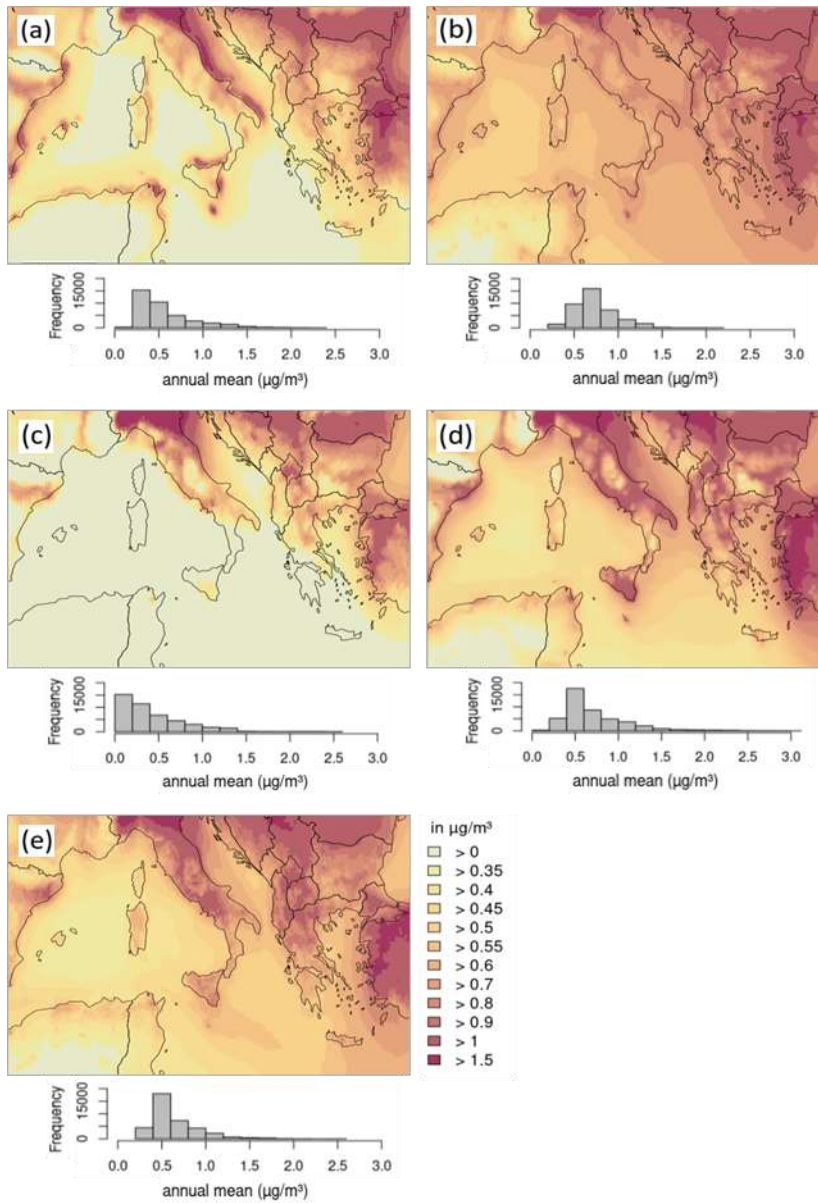

**Figure S15: Annual mean  $\text{NH}_4^+$  total concentration. (a) = CAMx, (b) = CHIMERE, (c) = CMAQ, (d) = EMEP, (e) = LOTOS-EUROS. Below the domain figure is the respective frequency distribution displayed for the annual mean  $\text{NH}_4$  concentration, referred to the whole model domain.**

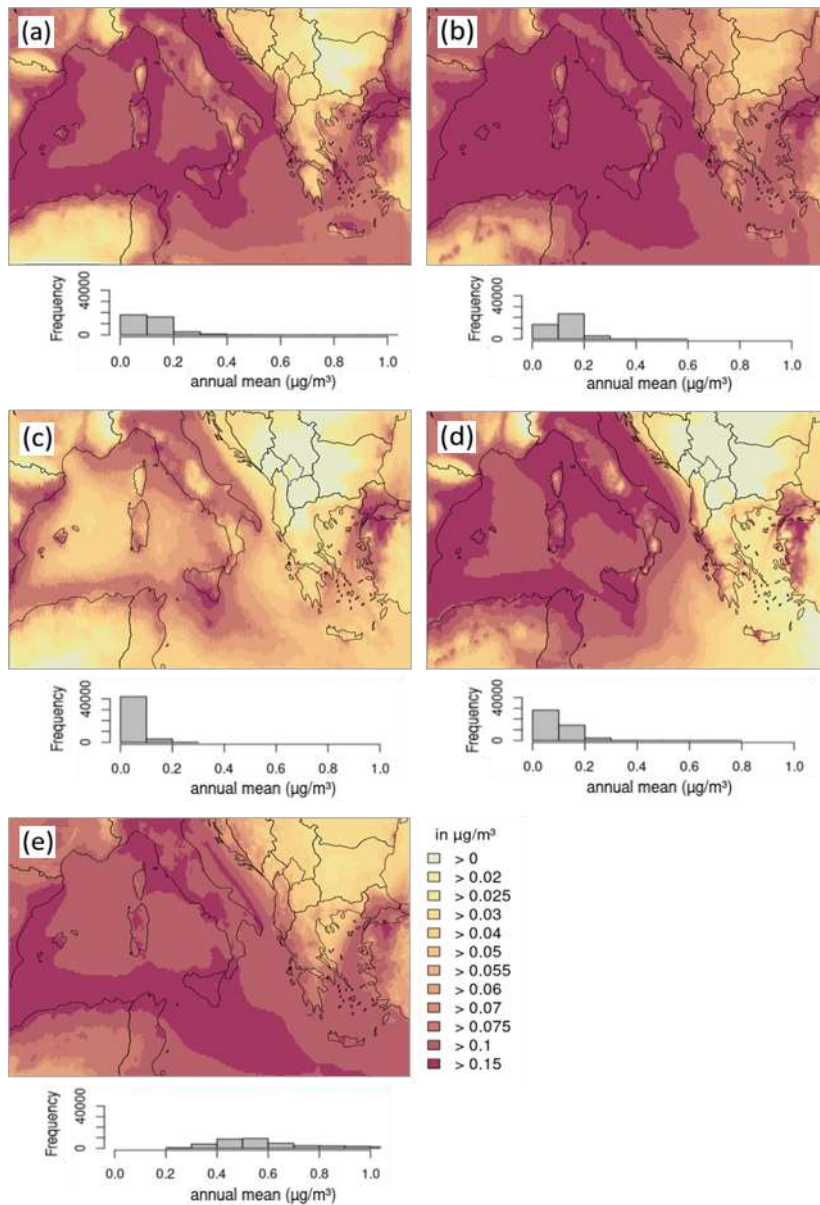

**Figure S16: Annual mean  $\text{NH}_4^+$  absolute potential ship impact. (a) = CAMx, (b) = CHIMERE, (c) = CMAQ, (d) = EMEP, (e) = LOTOS-EUROS. Below the domain figure is the respective frequency distribution displayed for the annual mean  $\text{NH}_4$  potential ship impact, referred to the whole model domain.**



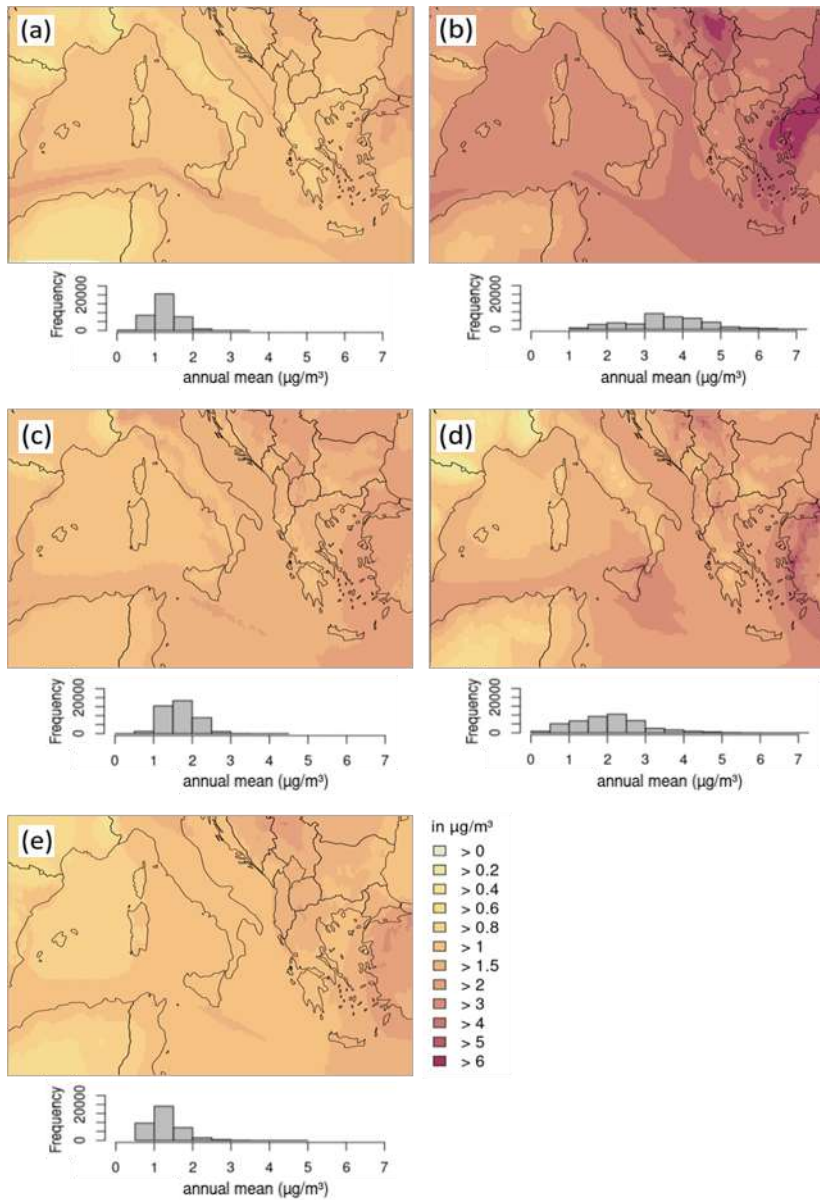

**Figure S17: Annual mean  $\text{SO}_4^{2-}$  total concentration. (a) = CAMx, (b) = CHIMERE, (c) = CMAQ, (d) = EMEP, (e) = LOTOS-EUROS. Below the domain figure is the respective frequency distribution displayed for the annual mean  $\text{SO}_4$  concentration, referred to the whole model domain.**

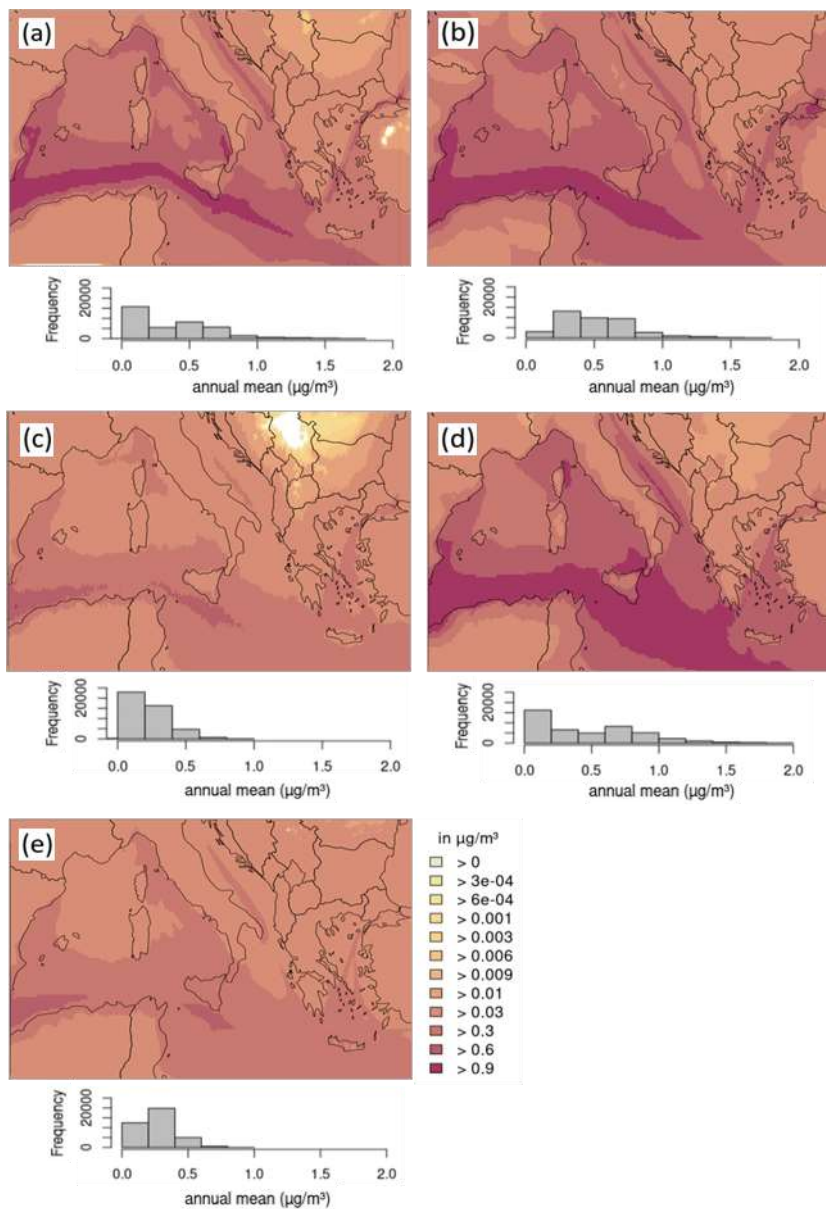

**Figure S18: Annual mean  $\text{SO}_4^{2-}$  absolute potential ship impact. (a) = CAMx, (b) = CHIMERE, (c) = CMAQ, (d) = EMEP, (e) = LOTOS-EUROS. Below the domain figure is the respective frequency distribution displayed for the annual mean  $\text{SO}_4$  potential ship impact, referred to the whole model domain.**

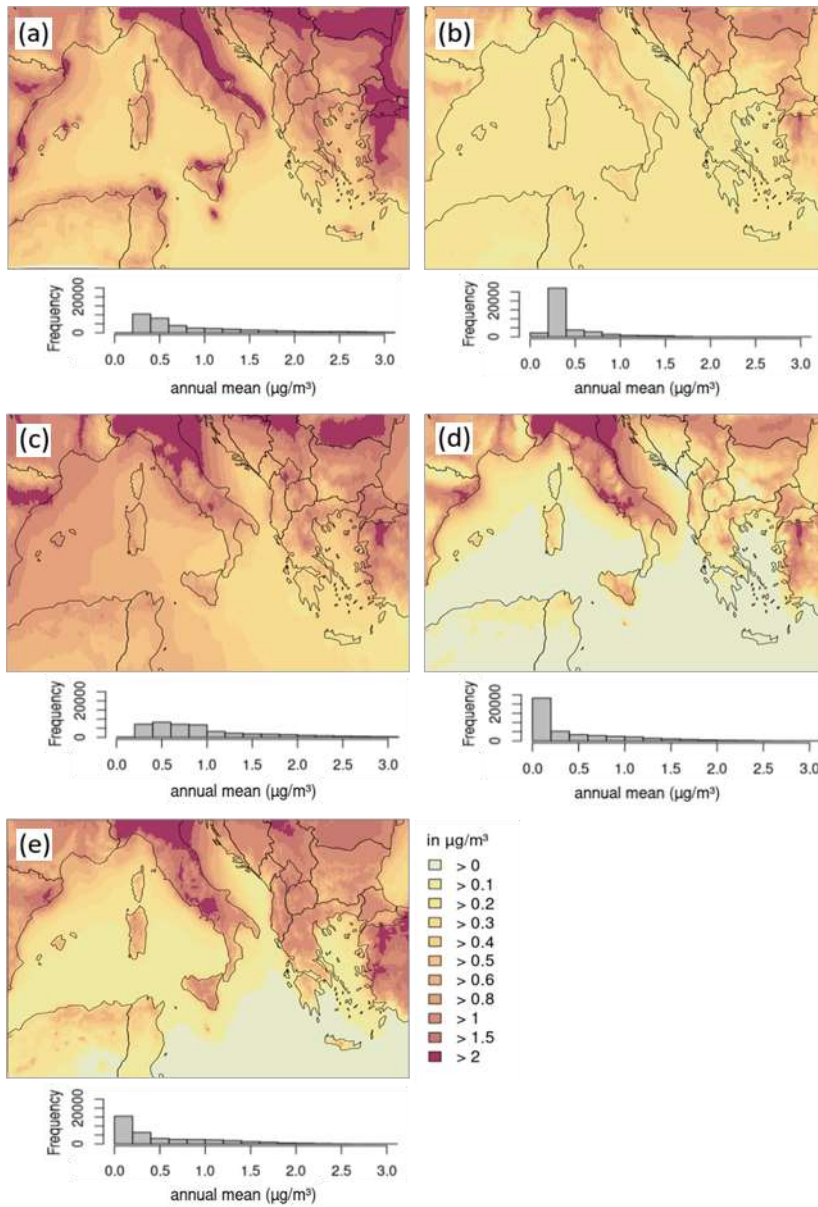

**Figure S19: Annual mean  $\text{NO}_3^-$  total concentration. (a) = CAMx, (b) = CHIMERE, (c) = CMAQ, (d) = EMEP, (e) = LOTOS-EUROS. Below the domain figure is the respective frequency distribution displayed for the annual mean  $\text{NO}_3^-$  concentration, referred to the whole model domain.**

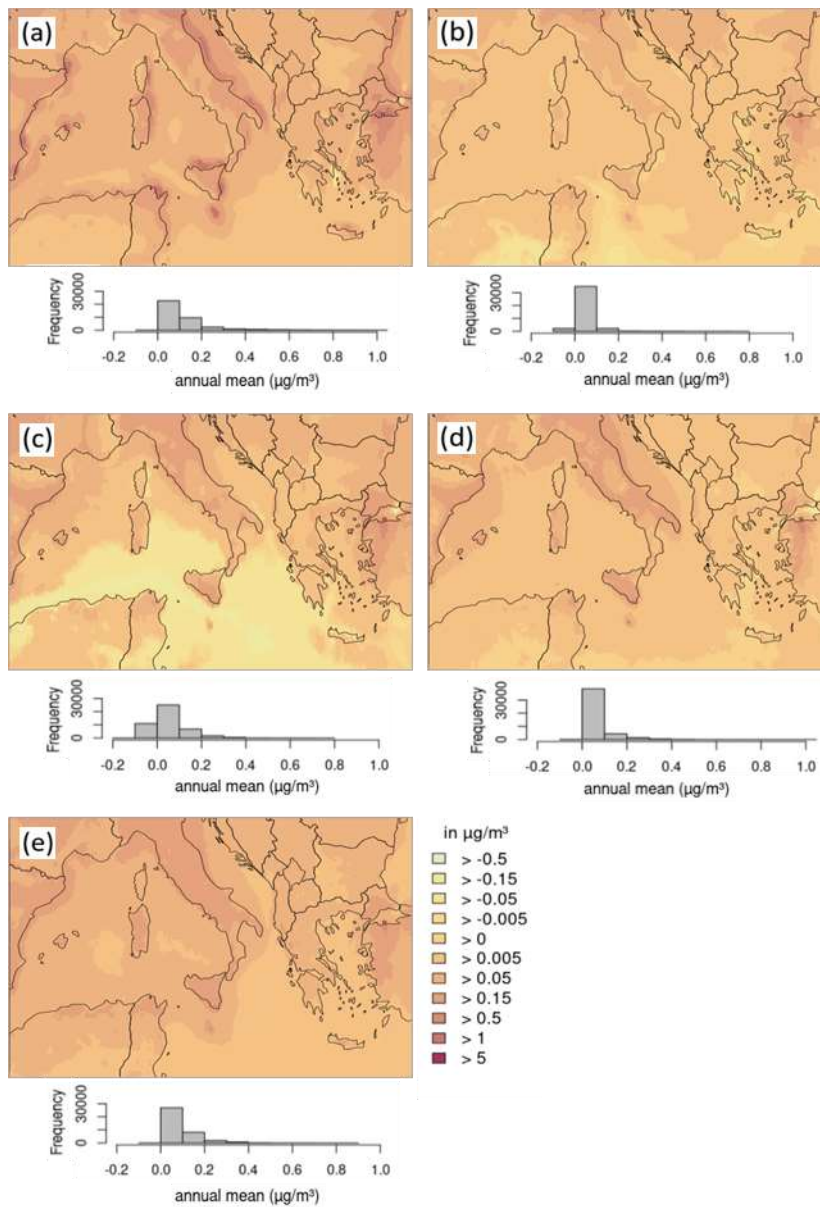

**Figure S20: Annual mean  $\text{NO}_3^-$  absolute potential ship impact. (a) = CAMx, (b) = CHIMERE, (c) = CMAQ, (d) = EMEP, (e) = LOTOS-EUROS. Below the domain figure is the respective frequency distribution displayed for the annual mean  $\text{NO}_3^-$  potential ship impact, referred to the whole model domain.**

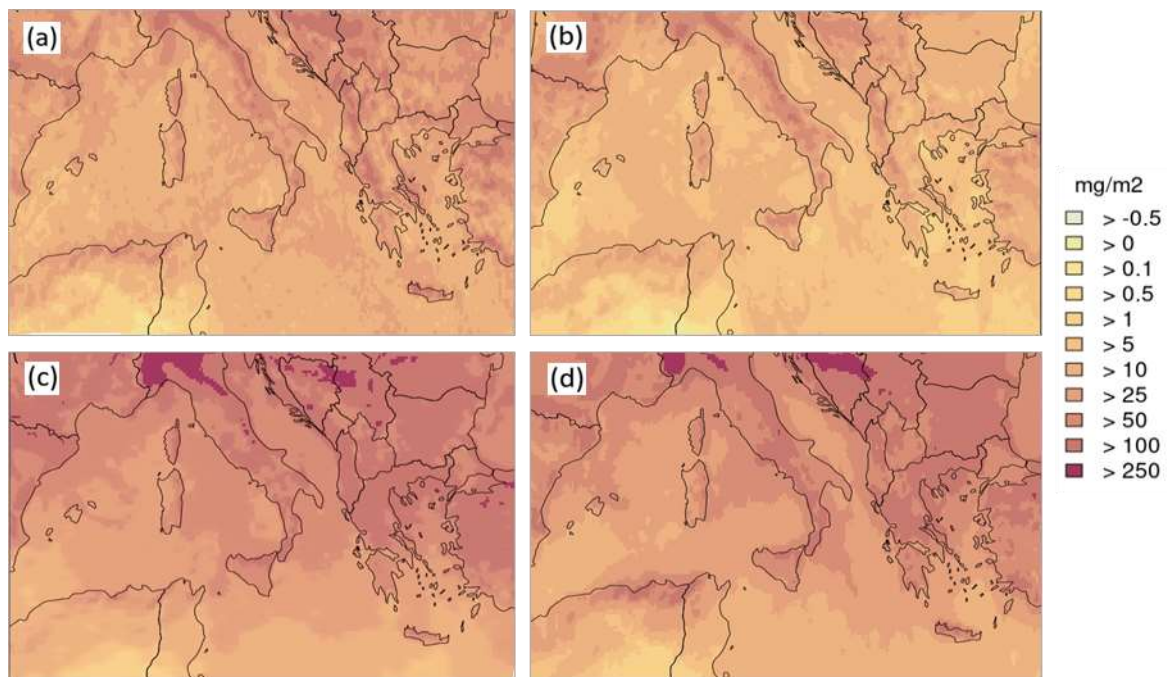

Figure S21:  $\text{NH}_4^+$  wet deposition annual sum. (a) = CAMx, (b) = CHIMERE, (c) = CMAQ, (d) = LOTOS-EUROS.

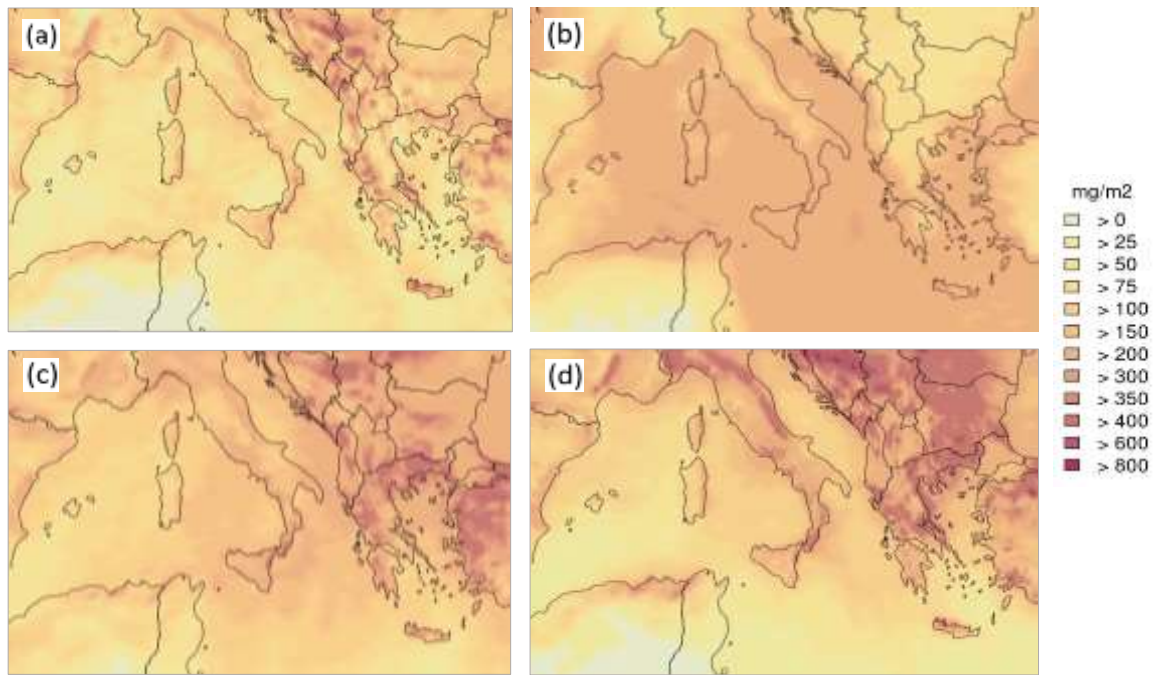

Figure S22:  $\text{SO}_4^{2-}$  wet deposition annual sum. (a) = CAMx, (b) = CHIMERE, (c) = CMAQ, (d) = LOTOS-EUROS.

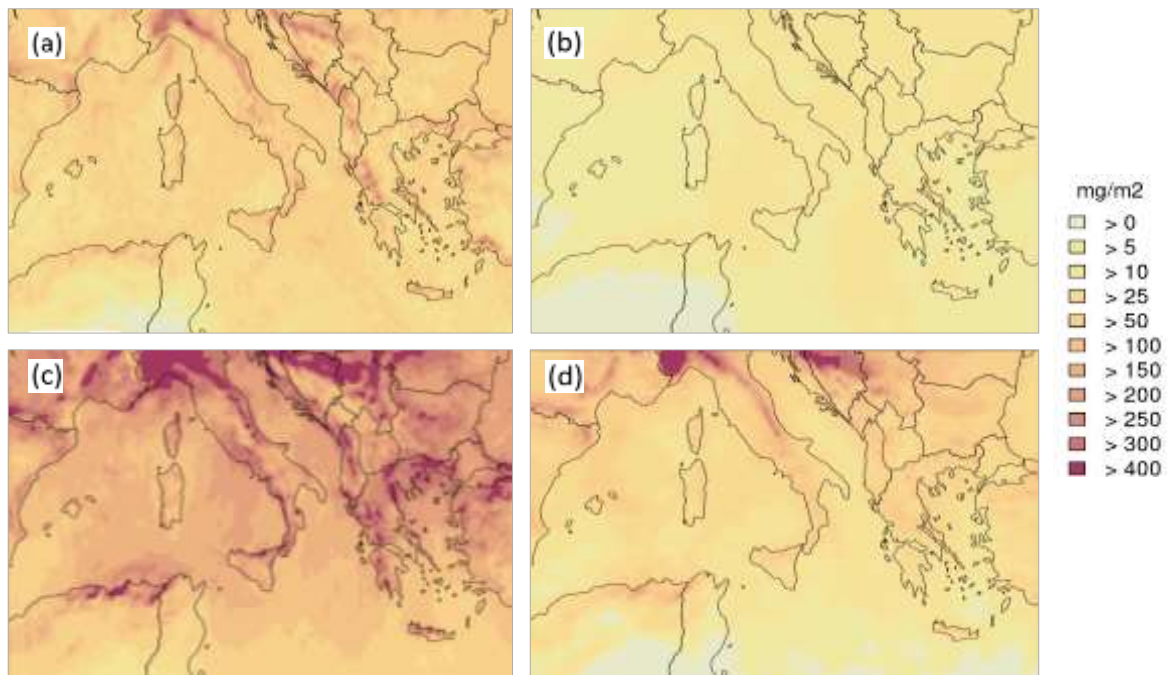

**Figure S23:  $\text{NO}_3$  wet deposition annual sum. (a) = CAMx, (b) = CHIMERE, (c) = CMAQ, (d) = LOTOS-EUROS.**

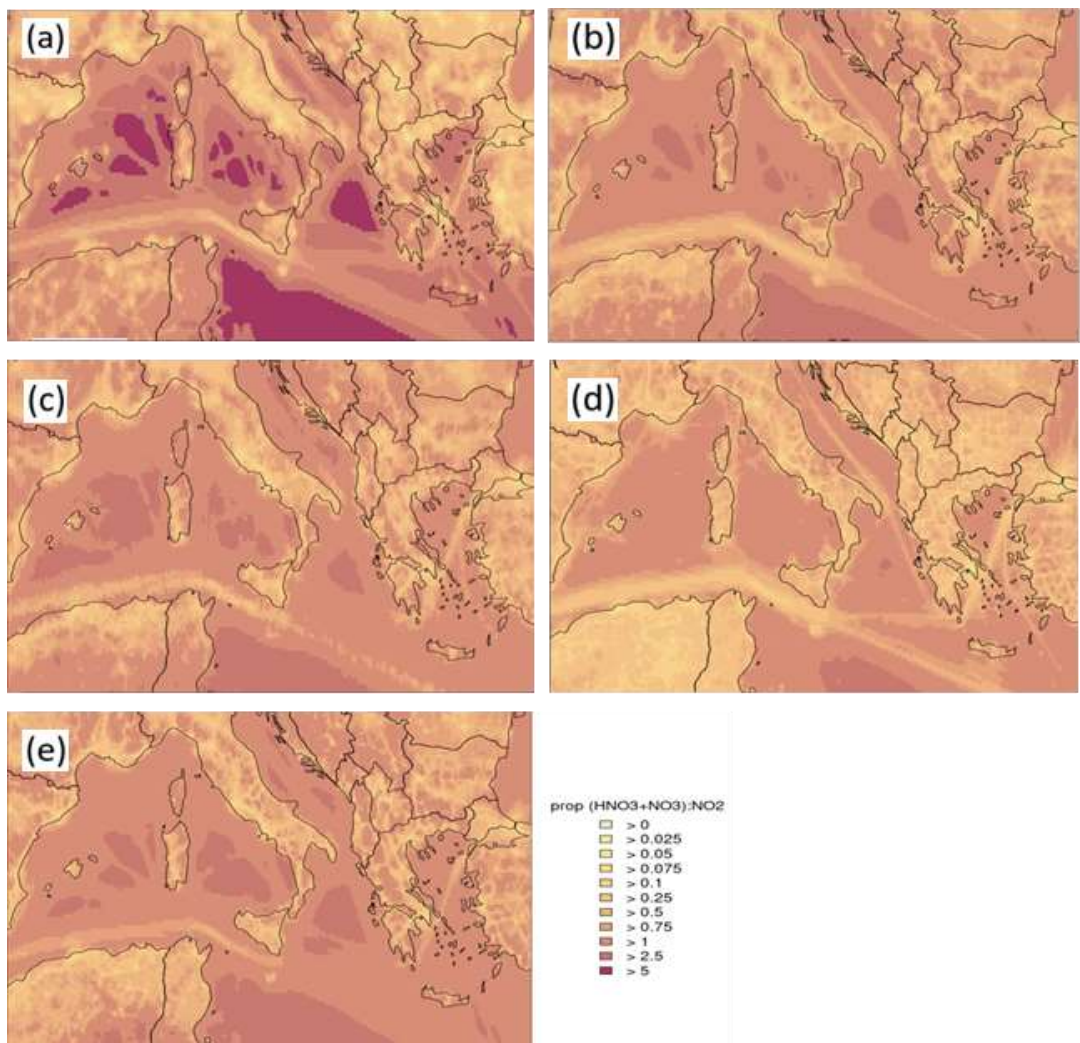

**Figure S24: Ratio  $(\text{HNO}_3 + \text{NO}_3) : \text{NO}_2$ . (a) = CAMx, (b) = CHIMERE, (c) = CMAQ, (d) = EMEP, (e) = LOTOS-EUROS.**



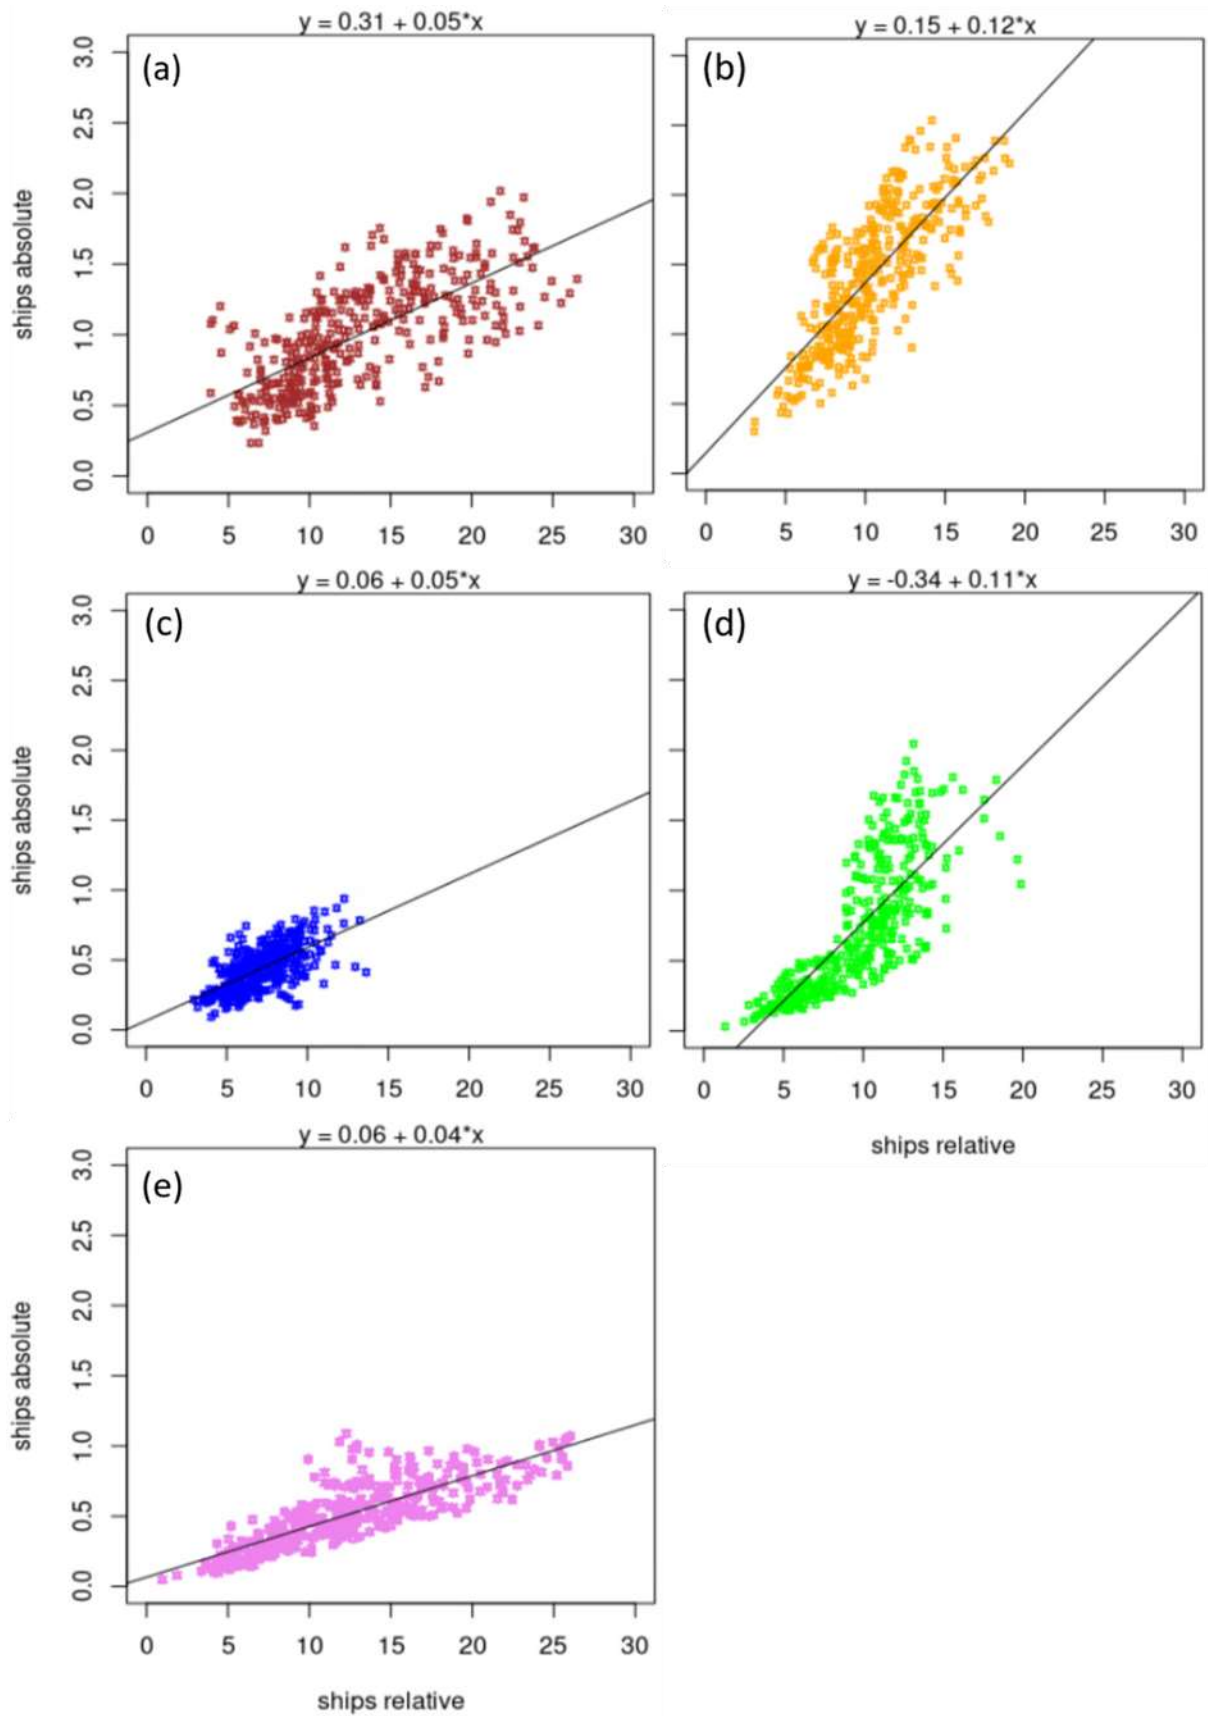

Figure S25: Relative ship impact plotted against absolute potential ship impact. (a) = CAMx, (b) = CHIMERE, (c) = CMAQ, (d) = EMEP, (e) = LOTOS-EUROS.

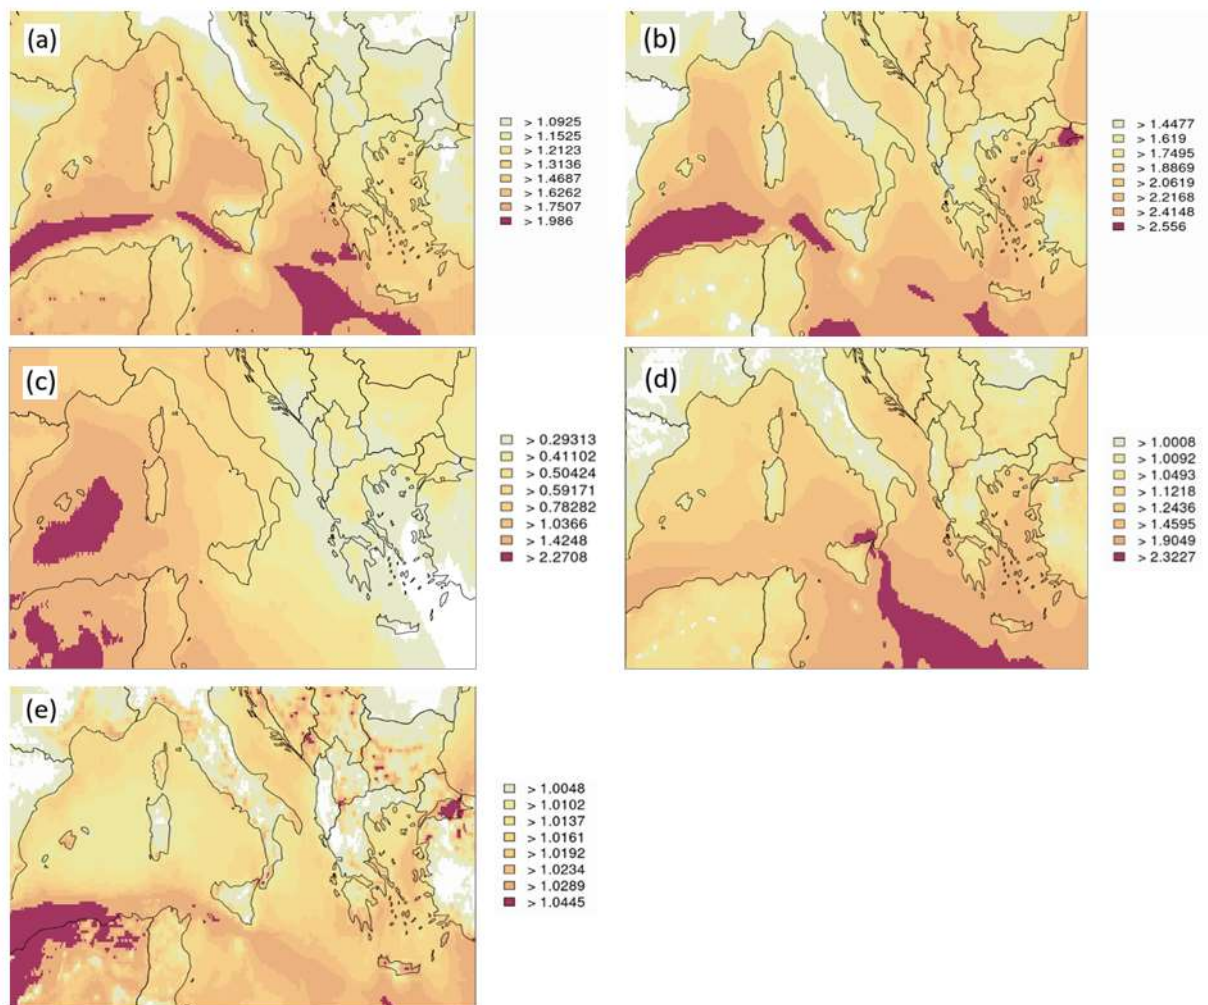

**Figure S26:** Maps display the ratio  $(2 \cdot \text{SO}_4^{2-} + \text{NO}_3^-) : \text{NH}_4^+$ ; calculated in mol. (a) = CAMx, (b) = CHIMERE, (c) = CMAQ, (d) = EMEP, (e) = LOTOS-EUROS.

(a)

No coarse  $\text{NO}_3$  in CAMx

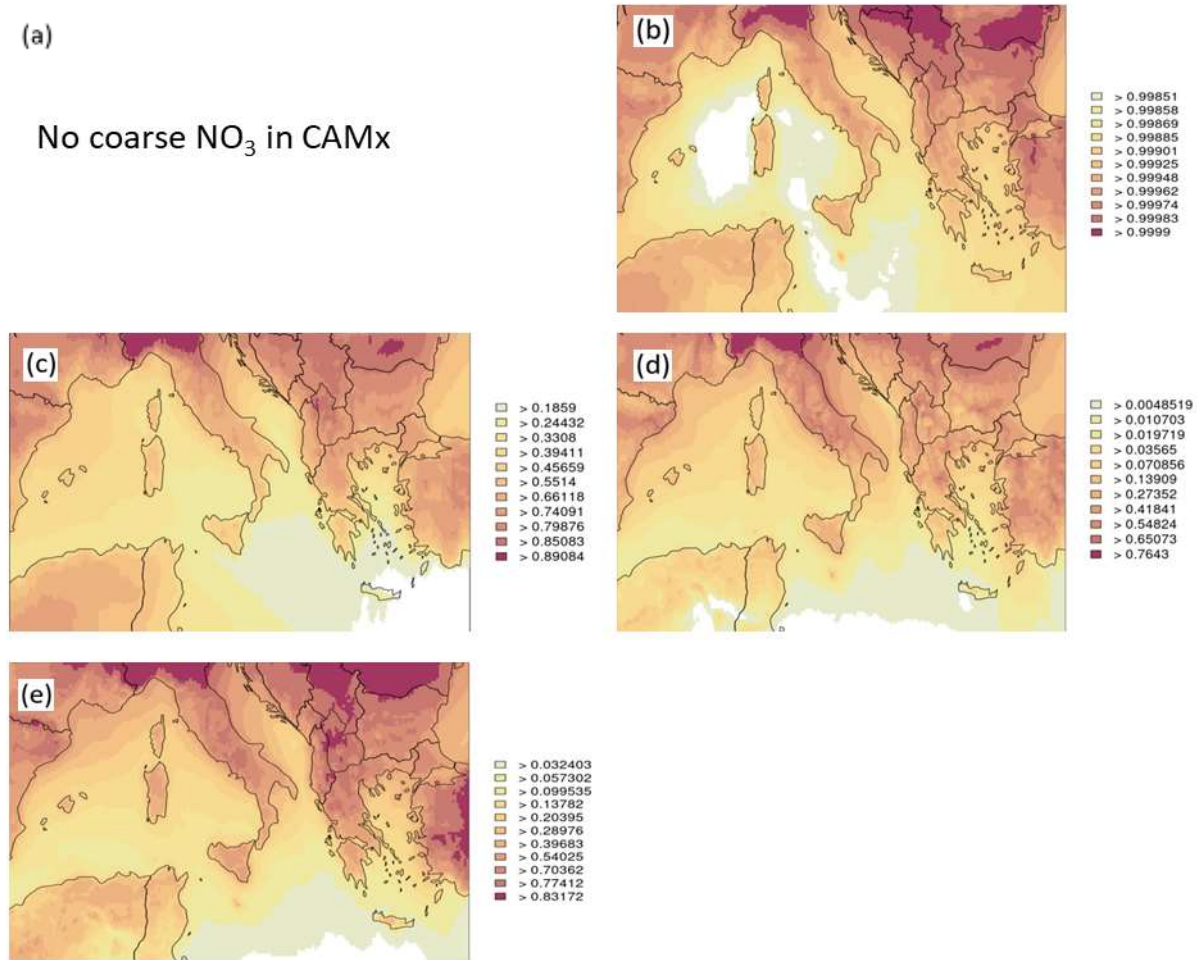

Figure S27: Maps display the ratio for the concentrations  $(\text{NO}_3^- \text{ fine}) / (\text{NO}_3^- \text{ fine} + \text{NO}_3^- \text{ coarse})$ . (b) = CHIMERE, (c) = CMAQ, (d) = EMEP, (e) = LOTOS-EUROS.

(a)

No coarse  $\text{SO}_4$  in CAMx

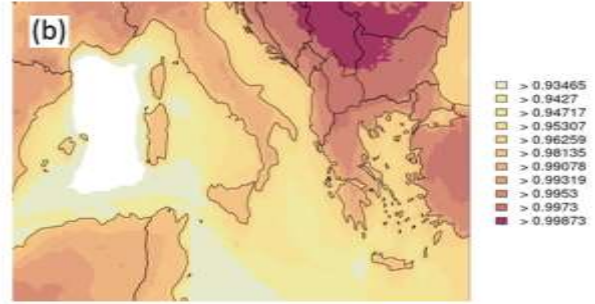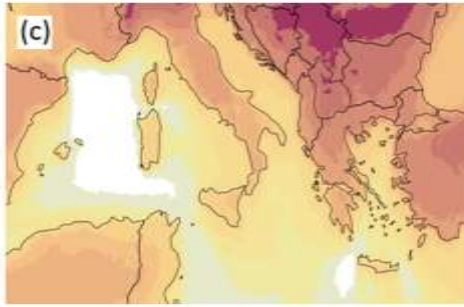

(d)

No coarse  $\text{SO}_4$  in EMEP

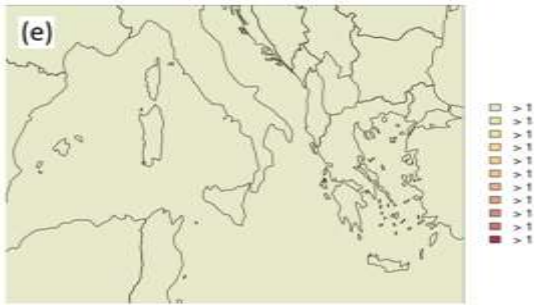

Figure S28: Maps display the ratio for the concentrations ( $\text{SO}_4^{2-}$  fine):( $\text{SO}_4^{2-}$  coarse). (b) = CHIMERE, (c) = CMAQ, (d) = EMEP, (e) = LOTOS-EUROS.
